# Supplementary material
Source: publisher site journal article supplement (https://www.dovepress.com/get_supplementary_file.php?f=supplementary_file_70139.pdf)
Supplement: Supplementary file 1 [file get_supplementary_file.php]

## Appendix 1: Summary of Literature Review Articles

| Ref. | Authors                                   | Journal                                             | Study Details                                                                                                                                                                                      | Motivations/Rewards                                                                                                                                                                                                        | Barriers/Challenges                                                                                                                                                                                                                                                                                                                                                                                                                                                                                                   | Recommendations /Conclusions                                                                                                |
|------|-------------------------------------------|-----------------------------------------------------|----------------------------------------------------------------------------------------------------------------------------------------------------------------------------------------------------|----------------------------------------------------------------------------------------------------------------------------------------------------------------------------------------------------------------------------|-----------------------------------------------------------------------------------------------------------------------------------------------------------------------------------------------------------------------------------------------------------------------------------------------------------------------------------------------------------------------------------------------------------------------------------------------------------------------------------------------------------------------|-----------------------------------------------------------------------------------------------------------------------------|
| 8    | Baldor RA et al                           | Medical Education; 2001                             | Design: Random Survey<br>Population: Family practitioners, general internists and pediatricians in the New England region<br>Sample Size: 701<br>Level of Students: Undergraduate medical students | -Enhanced enjoyment of practice<br>-Keeping own knowledge up to date<br>-Monetary payment, whether as a modest honorarium or as compensation for lost time/income, was felt to be important by half of sampled physicians. | -Decreased productivity<br>-Increased length of day (median 60 minutes)                                                                                                                                                                                                                                                                                                                                                                                                                                               | -Address negative perceptions and develop appropriate benefits packages to recruit and retain these primary care preceptors |
| 39   | Borges NJ, Navarro AM, Grover A, Hoban JD | Academic Medicine; 2010                             | Design: Literature Review<br>Population: Physicians with careers in academic medicine<br>Sample Size: 41 articles reviewed<br>Level of Students: N/A                                               |                                                                                                                                                                                                                            | -Pressure on academic physicians to generate more of salary through patient care, reducing time for research and/or teaching<br>-Lack of programs to produce physician-teachers<br>-Literature is void of studies evaluating exposure to research in teaching and education.<br>-Literature shows few programs for academic physicians who would like to have a teaching focus<br>-It is possible that many academic centers place more emphasis on research as opposed to teaching, therefore less physicians teach. |                                                                                                                             |
| 9    | Brennan EA, Hanson J, de Gara CJ          | University of Alberta Health Sciences Journal; 2006 | Design: Survey<br>Population: Physicians involved in clinical                                                                                                                                      | -Enjoyment of teaching<br>-Stay stimulated and current                                                                                                                                                                     | -Unprepared students and work taking longer to                                                                                                                                                                                                                                                                                                                                                                                                                                                                        | -Monetary reward, either directly or through departmental                                                                   |

|    |                             |                                 |                                                                                                                                                                                                                                      |                                                                                                                                                                                                                                                                                                                                                                                                                                                                                                 |                                                                                                                                                                                                                                                           |                                                                                                                                                                                                                                                                                            |
|----|-----------------------------|---------------------------------|--------------------------------------------------------------------------------------------------------------------------------------------------------------------------------------------------------------------------------------|-------------------------------------------------------------------------------------------------------------------------------------------------------------------------------------------------------------------------------------------------------------------------------------------------------------------------------------------------------------------------------------------------------------------------------------------------------------------------------------------------|-----------------------------------------------------------------------------------------------------------------------------------------------------------------------------------------------------------------------------------------------------------|--------------------------------------------------------------------------------------------------------------------------------------------------------------------------------------------------------------------------------------------------------------------------------------------|
|    |                             |                                 | <p>education at the University of Alberta</p> <p>Sample Size: 120 internal medicine and 85 surgical preceptors</p> <p>Level of Students: Medical students in clerkship</p>                                                           | <ul style="list-style-type: none"> <li>-Continue own learning process</li> <li>-Teach because others taught them</li> <li>-Passing on important information and observing student growth were found to be highly satisfying.</li> <li>-Financial reimbursement increased</li> <li>accountability toward students</li> <li>-Majority of clinicians felt that everyone should be rewarded or recognized for teaching while outstanding teachers should be given additional recognition</li> </ul> | <p>complete were viewed as negative aspects of teaching</p> <ul style="list-style-type: none"> <li>-Clinicians were less likely to continue teaching upon being given negative student reviews if they were not being compensated financially.</li> </ul> | <p>practice plans, should be the norm</p> <ul style="list-style-type: none"> <li>-Majority of clinicians felt that everyone should be rewarded or recognized for teaching</li> </ul>                                                                                                       |
| 10 | Dahlstrom , J et al.        | BMC Medical Education; 2005     | <p>Design: Survey sorted using Q methodology</p> <p>Population: Senior medical clinicians on a teaching list at The Canberra Hospital, Australia</p> <p>Sample Size: 75</p> <p>Level of Students: Undergraduate medical students</p> | <ul style="list-style-type: none"> <li>-Intrinsic motivations</li> <li>-Altruism</li> <li>-Intellectual satisfaction, improve own skills</li> </ul>                                                                                                                                                                                                                                                                                                                                             | <ul style="list-style-type: none"> <li>-Heavy clinical load/too much work</li> <li>-Wasted time</li> <li>-No strong involvement in course design</li> </ul>                                                                                               | <ul style="list-style-type: none"> <li>-Allow teachers to contribute to course development</li> <li>-Allocate time to teaching</li> <li>-Emphasize link between strong teaching and junior doctor outcomes</li> <li>-Remind staff of opportunity to 'advertize' their specialty</li> </ul> |
| 35 | Dodson, MC                  | Obstetrics and Gynecology; 1998 | <p>Design: Survey</p> <p>Population: Obstetricians and Gynecologists teaching clerkship students in six Michigan cities</p> <p>Sample Size: 163</p> <p>Level of Students: Medical students in clerkship</p>                          | <ul style="list-style-type: none"> <li>-Seminars or conferences to improve teaching skills</li> <li>-Potential rewards discounts on computers</li> </ul>                                                                                                                                                                                                                                                                                                                                        | <ul style="list-style-type: none"> <li>-Negative impact on patient flow</li> </ul>                                                                                                                                                                        | <ul style="list-style-type: none"> <li>-Financial remuneration may not be key to attracting and retaining volunteer faculty.</li> </ul>                                                                                                                                                    |
| 11 | Fulkerson PK., Wang-Cheng R | Family Medicine; 1997           | <p>Design: Survey</p> <p>Population: Community-based family physician preceptors involved in teaching of</p>                                                                                                                         | <ul style="list-style-type: none"> <li>-Personal satisfaction (84%)</li> <li>-University affiliation</li> <li>-Discounts</li> <li>-Workshops</li> </ul>                                                                                                                                                                                                                                                                                                                                         |                                                                                                                                                                                                                                                           | <ul style="list-style-type: none"> <li>-Develop a preceptor recognition/reward program using input from preceptors themselves</li> </ul>                                                                                                                                                   |

|    |                   |                                            |                                                                                                                                                                                        |                                                                                                                                                                                                                                                                                                                                                                                                                      |                                                                                                                                                                                                                                                                                                                           |                                                                                                                                                                                                                                                                                                                                                                                                                                                                                            |
|----|-------------------|--------------------------------------------|----------------------------------------------------------------------------------------------------------------------------------------------------------------------------------------|----------------------------------------------------------------------------------------------------------------------------------------------------------------------------------------------------------------------------------------------------------------------------------------------------------------------------------------------------------------------------------------------------------------------|---------------------------------------------------------------------------------------------------------------------------------------------------------------------------------------------------------------------------------------------------------------------------------------------------------------------------|--------------------------------------------------------------------------------------------------------------------------------------------------------------------------------------------------------------------------------------------------------------------------------------------------------------------------------------------------------------------------------------------------------------------------------------------------------------------------------------------|
|    |                   |                                            | clerkship students<br>Sample Size: 120<br>Level of Students:<br>Medical students<br>year 3                                                                                             |                                                                                                                                                                                                                                                                                                                                                                                                                      |                                                                                                                                                                                                                                                                                                                           |                                                                                                                                                                                                                                                                                                                                                                                                                                                                                            |
| 2  | Gerrity, MS et al | Journal of General Internal Medicine; 1997 | Design: Literature review<br>Population: Physicians involved in clinical-teaching<br>Sample Size: 20 articles reviewed<br>Level of Students: Undergraduate medical students, residents | -Intrinsic rewards: observing outcomes of teaching, share satisfaction derived from patient care with students<br>-Role model opportunity is source of satisfaction<br>-Physician self-reflection on skills as they observe how they teach students<br>-New perspectives obtained from students or residents<br>-Learners may contribute to practice<br>-Patients may feel empowered by opportunity to help learners | -Possible loss of productivity and time<br>-Patient may not voice all concern in presence of learner<br>-May interfere with physician relationship with patients<br>-Clinician-teachers may experience doubts about their skill as teachers                                                                               | -Find ways to enhance own teaching skills<br>-Take advantage of faculty-development programs offered by one's medical center or professional organizations<br>-Collaborate and learn strategies for teaching from other clinician-teachers<br>-Clinicians should find time to share their interests with their students and to learn about student interests<br>-Give clinician-teachers faculty appointments<br>-Include clinician-teachers in educational policy and program development |
| 12 | Gray J, Fine B    | British Journal of General Practice; 1997  | Design: Survey<br>Population: General Practitioners in London, England<br>Sample Size: 310<br>Level of Students: Undergraduate medical students                                        | -Opportunity to learn from own teaching is a reward<br>-May enhance doctor-patient relationship<br>-Helping with students' personal development<br>-Developing own teaching skills<br>-Feeling that teaching makes everyday work of general practice more interesting                                                                                                                                                | -90.7% of GP's reported lack of time as factor<br>-59.9% reported lack of space as a problem<br>-34% reported lack of confidence in their own knowledge<br>-25.3% felt that teaching may have an adverse effect on patient care<br>-More undergraduate teachers felt that remuneration was inadequate<br>-Small number of | -Provision of locum cover, adequate financial reward for teaching, teacher training, and tutor's groups would be well received.                                                                                                                                                                                                                                                                                                                                                            |

|    |                                              |                                            |                                                                                                                                                                                                                                   |                                                                                                                                                                                                           |                                                                                                                                                                                                                                                       |                                                                                                                                                                                                                                                                                                                                                                                                                                                                                                                                                                                                                      |
|----|----------------------------------------------|--------------------------------------------|-----------------------------------------------------------------------------------------------------------------------------------------------------------------------------------------------------------------------------------|-----------------------------------------------------------------------------------------------------------------------------------------------------------------------------------------------------------|-------------------------------------------------------------------------------------------------------------------------------------------------------------------------------------------------------------------------------------------------------|----------------------------------------------------------------------------------------------------------------------------------------------------------------------------------------------------------------------------------------------------------------------------------------------------------------------------------------------------------------------------------------------------------------------------------------------------------------------------------------------------------------------------------------------------------------------------------------------------------------------|
|    |                                              |                                            |                                                                                                                                                                                                                                   |                                                                                                                                                                                                           | GPs felt they may be unsupported in teaching endeavors by their practice partners                                                                                                                                                                     |                                                                                                                                                                                                                                                                                                                                                                                                                                                                                                                                                                                                                      |
| 13 | Grayson MS, Klein M, Lugo J, Visintainer P   | Journal of General Internal Medicine; 1998 | Design: Cross-sectional survey<br>Population: Community-based primary care physicians serving as preceptors at New York Medical College<br>Sample Size: 185<br>Level of Students: Medical students years 1-2                      | -More job satisfaction<br>-Kept up to date through contact with students<br>-Held in higher esteem by patients                                                                                            | -Decline in number of patients<br>-Potential increase in cost to the practice                                                                                                                                                                         | -Being able to provide physicians with an experience that will enhance their professional growth and satisfaction may be a compelling recruitment benefit                                                                                                                                                                                                                                                                                                                                                                                                                                                            |
| 14 | Hartley S, Macfarlane F, Gantley M, Murray E | British Medical Journal; 1999              | Design: Qualitative semistructured interview<br>Population: General practitioners in north London, England who taught clinical skills to medical students<br>Sample Size: 30<br>Level of Students: Undergraduate medical students | -Overall positive effect on morale<br>-Contact with enthusiastic students<br>-Increased time with patients<br>-Improved clinical practice<br>-Improved teaching skills<br>-Improved image of the practice | -Lack of time and space<br>-Teachers thought that "short cuts" in their clinical examination of patients were not appropriate for students to learn.<br>-Unsupportive practice partners<br>-Problems recruiting patients to participate with students | -Positive outcomes rely on providing good quality teacher training to novice teachers<br>-Provide ongoing support and networking opportunities to all teachers<br>-Provide adequate funding to permit teachers to reduce their clinical commitments<br>-Encourage all doctors within a practice to commit to teaching<br>-General practitioner teachers reported an increase in morale, improvements in clinical skills, and changes in clinical practice and in practice infrastructure as a result of teaching and training.<br>-Positive effects on morale and clinical practice may be important for sustainable |

|    |                                       |                                            |                                                                                                                                                                                                                        |                                                                                                                                                                                                                                      |                                                                                                                                                                |                                                                                                                                                                                                                                                                                                                                                                                                                            |
|----|---------------------------------------|--------------------------------------------|------------------------------------------------------------------------------------------------------------------------------------------------------------------------------------------------------------------------|--------------------------------------------------------------------------------------------------------------------------------------------------------------------------------------------------------------------------------------|----------------------------------------------------------------------------------------------------------------------------------------------------------------|----------------------------------------------------------------------------------------------------------------------------------------------------------------------------------------------------------------------------------------------------------------------------------------------------------------------------------------------------------------------------------------------------------------------------|
|    |                                       |                                            |                                                                                                                                                                                                                        |                                                                                                                                                                                                                                      |                                                                                                                                                                | teaching and continuing medical education                                                                                                                                                                                                                                                                                                                                                                                  |
| 15 | Hill N, Wolf KN, Bossetti B, Saddam A | Journal of Allied Health; 1999             | Design: Survey<br>Population: Various physicians acting as "clinical instructors", representing five allied health programs in Columbus, Ohio<br>Sample Size: 430<br>Level of Students: Undergraduate medical students | -Observing student development is rewarding                                                                                                                                                                                          | -Low student motivation/poor professional behaviour is frustrating<br>-Benefits of teaching reduced by increased pressure due to restructuring of health care. | -Study supports need for further preparation of students entering clinical setting<br>-Reward system for preceptors                                                                                                                                                                                                                                                                                                        |
| 16 | Hoban J et al                         | Academic Medicine; 1996                    | Design: Survey<br>Population: Faculty members at the Bowman Gray School of Medicine in North Carolina<br>Sample Size: 348<br>Level of Students: Undergraduate medical students, residents                              | -Personal enrichment<br>-Recognition/reward<br>-Funds to improve teaching                                                                                                                                                            |                                                                                                                                                                | 70% of 348 survey respondents favoured establishing a teaching-incentive program at the Bowman Gray School of Medicine. Suggested incentives included 1) "recognition of outstanding teaching by department; 2) "dean's teaching list"; 3) "master teacher award"; 4) "letter of appreciation"; 5) "a financial award . . . for professional travel, books, dues . . ."; and 6) "funds to develop instructional material." |
| 36 | Kumar A et al.                        | Journal of General Internal Medicine; 1999 | Design: Survey<br>Population: Clerkship directors or coordinators of pediatrics, family medicine, and internal medicine in all U.S. medical schools and administrators of pediatrics clerkships in 16 Canadian medical | -Pediatrics, family and internal medicine programs surveyed at U.S. medical schools and pediatrics at Canadian schools<br>-Monetary payment offered 13-22% of programs<br>-Educational opportunities 70-89% of programs<br>-Academic |                                                                                                                                                                | -Trim roster of clinical faculty, leaving only those who contribute significantly to the teaching programs, and redistribute any payments for teaching among smaller number of teachers                                                                                                                                                                                                                                    |

|    |                                    |                                               |                                                                                                                                                                                                                                                                               |                                                                                                                                                                       |                                                                                                                  |                                                                                                                    |
|----|------------------------------------|-----------------------------------------------|-------------------------------------------------------------------------------------------------------------------------------------------------------------------------------------------------------------------------------------------------------------------------------|-----------------------------------------------------------------------------------------------------------------------------------------------------------------------|------------------------------------------------------------------------------------------------------------------|--------------------------------------------------------------------------------------------------------------------|
|    |                                    |                                               | schools<br>Sample Size: 338<br>respondents<br>Level of Students:<br>Medical students in<br>clerkship                                                                                                                                                                          | appointments 90-<br>95% of programs<br>-Special recognition<br>events 62-79% of<br>programs<br>-Appreciation letters<br>74-84% of programs                            |                                                                                                                  |                                                                                                                    |
| 17 | Kumar A,<br>Kallen DJ,<br>Mathew T | Teaching and<br>Learning in<br>Medicine; 2002 | Design: Survey<br>Population:<br>Volunteer clinical<br>teachers in<br>pediatric, family<br>practice and<br>internal medicine<br>clerkships at<br>medical schools<br>across the United<br>States<br>Sample Size: 257<br>Level of Students:<br>Medical students in<br>clerkship | -Personal satisfaction<br>highest rated<br>-In contrast,<br>payments, gifts or<br>services judged to be<br>less important<br>-Some emphasis on<br>rebates and rewards |                                                                                                                  |                                                                                                                    |
| 37 | Langlois<br>JP                     | Family<br>Medicine; 1995                      | Design: Survey<br>Population:<br>Community-based<br>preceptors for the<br>University of North<br>Carolina's third-<br>year family<br>medicine clerkship<br>Sample Size: 112<br>Level of Students:<br>Medical students<br>year 3                                               | -Payment, financial<br>aid and textbooks are<br>possible incentives<br>for participation in<br>teaching                                                               |                                                                                                                  |                                                                                                                    |
| 38 | Latessa R<br>et al.                | Family<br>Medicine; 2008                      | Design: Survey<br>Population:<br>Primarily General<br>Practitioners who<br>act as community-<br>based preceptors<br>for medical<br>students across the<br>state of North<br>Carolina<br>Sample Size: 817<br>Level of Students:<br>Undergraduate<br>medical students           | -Interest in promoting<br>family medicine<br>-High level of<br>satisfaction with<br>teaching                                                                          | -Impaired patient<br>flow<br>-Increased working<br>time<br>-Less satisfied with<br>income while with<br>students | -Tailor support to<br>meet individual<br>preceptor needs                                                           |
| 18 | Latessa R<br>et al.                | Academic<br>Medicine; 2007                    | Design: Survey<br>Population:<br>Community-based<br>primary care<br>preceptors in the<br>North Carolina<br>Area Health                                                                                                                                                        | -High level of<br>satisfaction with<br>teaching<br>-Value placed on<br>intrinsic reasons for<br>precepting<br>(enjoyment of                                           | -Negative impact of<br>students on<br>professional life                                                          | -Tailoring support<br>to meet individual<br>preceptor<br>preferences can<br>maximize<br>resources and<br>encourage |

|    |                                                |                                   |                                                                                                                                                                                                    |                                                                                                                                                                                                                                                                                                                  |                                                                                                                                                                       |                                                                                                               |
|----|------------------------------------------------|-----------------------------------|----------------------------------------------------------------------------------------------------------------------------------------------------------------------------------------------------|------------------------------------------------------------------------------------------------------------------------------------------------------------------------------------------------------------------------------------------------------------------------------------------------------------------|-----------------------------------------------------------------------------------------------------------------------------------------------------------------------|---------------------------------------------------------------------------------------------------------------|
|    |                                                |                                   | Education Centers system<br>Sample Size: 1428<br>Level of Students: Undergraduate medical students                                                                                                 | teaching) rather than extrinsic rewards (such as access to library resources).                                                                                                                                                                                                                                   |                                                                                                                                                                       | preceptor retention                                                                                           |
| 19 | Levy BT, Gjerde CL, Albrecht LA                | Academic Medicine; 1997           | Design: Survey<br>Population: Family medicine preceptors at the University of Iowa College of Medicine<br>Sample Size: 130<br>Level of Students: Medical students year 3                           | -Interest in training and access to computer-based information<br>-Satisfaction of teaching (Intrinsic motivations)<br>-Positive interactions with students                                                                                                                                                      | -More time spent in practice due to teaching (87%), an average of 51 more minutes.<br>-An average of 1.4 fewer patients seen (31%),<br>-Loss of practice income (25%) | -Medical schools need to recognize the valuable contributions of preceptors and find ways to support them     |
| 20 | May M, Mand P, Biertz F et al                  | PLoS One; 2012                    | Design: Survey<br>Population: German family physicians who teach undergraduate medical students in their practices<br>Sample Size: 523<br>Level of Students: Undergraduate medical students        | -Contact/affiliation with the local university (rural physicians)<br>-'Helping others' was a predominant motive<br>-Interest in transferring knowledge<br>-Desire to improve medical education<br>-Promote family medicine<br>-Stay up to date<br>-Material compensation was rated as being of little importance | -Lack of time listed as only relevant adverse motivational factor                                                                                                     | -Increase physician involvement in curriculum development                                                     |
| 21 | Molodysky E, Bunker J, Lee C, Sekelja N.       | Australian Family Physician; 2006 | Design: Survey<br>Population: General practitioners teaching undergraduate medical students in New South Wales, Australia<br>Sample Size: 195<br>Level of Students: Undergraduate medical students | -Sense of duty<br>-Enjoyable personal aspect of contact and sharing knowledge with students<br>-Allowed physician to keep up to date                                                                                                                                                                             | -Lack of time<br>-Competing commitments<br>-Lack of opportunity to teach                                                                                              | -Do not rely on GPs self selecting as teachers<br>-Active recruitment and retention strategies may be needed  |
| 22 | Moorhead R, Brett T, Arnold-Reed D, Saldanha M | Medical Teacher; 2012             | Design: Survey<br>Population: Teaching general practitioners (urban and rural) from the Notre Dame School of                                                                                       | -Thirty-six (62%) of respondents reported that teaching helps a physician reflect and analyze their own clinical practicing.<br>-Thirty-six (62%) felt                                                                                                                                                           | -Fifty-six (97%) reported that taking medical students created time pressure/slowed down the practice<br>-26 (45%) felt there                                         | -To maintain general practice interest in teaching, it may be useful to tailor educational support through an |

|    |                                         |                                         |                                                                                                                                                                                       |                                                                                                                                                                                                                                                                                                                                                                           |                                                                                                                                                                                                                                                                                                                                                                                                                                                                                                                                             |                                                                                                   |
|----|-----------------------------------------|-----------------------------------------|---------------------------------------------------------------------------------------------------------------------------------------------------------------------------------------|---------------------------------------------------------------------------------------------------------------------------------------------------------------------------------------------------------------------------------------------------------------------------------------------------------------------------------------------------------------------------|---------------------------------------------------------------------------------------------------------------------------------------------------------------------------------------------------------------------------------------------------------------------------------------------------------------------------------------------------------------------------------------------------------------------------------------------------------------------------------------------------------------------------------------------|---------------------------------------------------------------------------------------------------|
|    |                                         |                                         | <p>Medicine in Western Australia<br/> Sample Size: 58<br/> Level of Students: Undergraduate medical students</p>                                                                      | <p>they gained fresh ideas and knowledge from students they taught<br/> -Altruism seemed to drive 27 (47%) respondents to teach<br/> -29% indicated teaching as an opportunity to advocate general practice as a career</p>                                                                                                                                               | <p>was a loss of income/poor remuneration for teaching.</p>                                                                                                                                                                                                                                                                                                                                                                                                                                                                                 | <p>appropriately trained academic general practitioner frequently visiting teaching practices</p> |
| 23 | Prichard D, Collins N, Boohan M, Wall C | Teaching and Learning in Medicine; 2011 | <p>Design: Survey<br/> Population: Nonconsultant hospital doctors in a major Irish teaching hospital<br/> Sample Size: 139<br/> Level of Students: Undergraduate medical students</p> | <p>-Male vs. female physicians equally felt that teaching medical students is a responsibility of all hospital doctors<br/> -There was no significant gender difference in proportion of physicians who enjoyed teaching medical students<br/> -Males and females equally felt that all doctors, irrespective of seniority, are valuable teachers for undergraduates.</p> | <p>-A greater proportion of male vs. female doctors had previous educational training, although this was not statistically significant.<br/> -In three items of the differential scale there was a statistical difference between the genders' responses, with male doctors reporting a significantly higher mean score than female in the following statements: "I feel my clinical knowledge is adequate for teaching undergraduates," "I feel confident in my role as an educator," and "I think that I am a good clinical teacher."</p> |                                                                                                   |
| 24 | Rutter H, Herzberg J, Paice E           | Medical Education; 2002                 | <p>Design: Literature review<br/> Population: Physicians and dentists who teach<br/> Sample Size: N/A<br/> Level of Students: Undergraduate medical students, residents</p>           | <p>-Stress reduction</p>                                                                                                                                                                                                                                                                                                                                                  |                                                                                                                                                                                                                                                                                                                                                                                                                                                                                                                                             |                                                                                                   |
| 25 | Scott I, Sazegar P                      | Medical Teacher; 2006                   | <p>Design: Survey<br/> Population: Family medicine community preceptors in</p>                                                                                                        | <p>-Joy in teaching and passing knowledge to students.<br/> -Student enthusiasm is invigorating and</p>                                                                                                                                                                                                                                                                   | <p>-Practice situation (space, patient population, times in the office) considered a barrier</p>                                                                                                                                                                                                                                                                                                                                                                                                                                            |                                                                                                   |



|    |                                  |                                               |                                                                                                                                                                                                                                                                                               |                                                                                                                                                                                                                                                                                                                                                                                                                                |                                                                                                                                                                                                                                                                                                                                                                                                           |                                                                                                                                                                                                                                                                      |
|----|----------------------------------|-----------------------------------------------|-----------------------------------------------------------------------------------------------------------------------------------------------------------------------------------------------------------------------------------------------------------------------------------------------|--------------------------------------------------------------------------------------------------------------------------------------------------------------------------------------------------------------------------------------------------------------------------------------------------------------------------------------------------------------------------------------------------------------------------------|-----------------------------------------------------------------------------------------------------------------------------------------------------------------------------------------------------------------------------------------------------------------------------------------------------------------------------------------------------------------------------------------------------------|----------------------------------------------------------------------------------------------------------------------------------------------------------------------------------------------------------------------------------------------------------------------|
|    |                                  |                                               | Greater Vancouver<br>Sample Size: 116<br>Level of Students:<br>Medical students<br>years 1-2                                                                                                                                                                                                  | increases enjoyment<br>of medicine.<br>-Being able to teach<br>communication skills<br>to students.                                                                                                                                                                                                                                                                                                                            | -Workload too high<br>-Unaware of<br>teaching<br>opportunities                                                                                                                                                                                                                                                                                                                                            |                                                                                                                                                                                                                                                                      |
| 26 | Starr S et<br>al.                | Academic<br>Medicine; 2003                    | Design: Focus<br>group study<br>Population:<br>Community<br>preceptors from<br>various specialties<br>representing 11<br>schools of medicine<br>in New England<br>and New York State<br>Sample Size: 35<br>Level of Students:<br>Medical students<br>and residents                            | -Feeling of<br>satisfaction in<br>teaching<br>-Responsibility to<br>teach<br>-Sharing clinical<br>experience<br>-Few interested in<br>receiving payment<br>-Some would<br>appreciate<br>acknowledgement<br>from the university.                                                                                                                                                                                                |                                                                                                                                                                                                                                                                                                                                                                                                           | -Genuine<br>recognition for<br>teaching efforts by<br>medical school,<br>specifically in the<br>form of faculty<br>development<br>opportunities                                                                                                                      |
| 27 | Starr S et<br>al.                | Teaching and<br>Learning in<br>Medicine; 2006 | Design: Survey<br>Population:<br>Community<br>physician<br>preceptors of pre-<br>clinical students<br>associated with<br>University of<br>Massachusetts<br>Medical School<br>Sample Size: 127<br>Level of Students:<br>Medical students<br>and residents                                      | -Satisfaction of<br>teaching<br>-Knowledge of<br>abilities to teach<br>-Belonging to a<br>community of<br>teachers<br>-Receiving awards for<br>teaching<br>-Responsibility to<br>teach                                                                                                                                                                                                                                         |                                                                                                                                                                                                                                                                                                                                                                                                           | -It is arguable that<br>well being is<br>enhanced by<br>increasing the<br>extent to which<br>physicians<br>experience<br>meaning in their<br>work. Rewarding<br>and supporting<br>physicians to teach<br>may be a way to<br>increase meaning<br>and job satisfaction |
| 4  | Sturman<br>N, Rego P,<br>Dick ML | Medical<br>Education; 2011                    | Design: Qualitative<br>semistructured<br>interview<br>Population:<br>General<br>practitioners in<br>Brisbane-based<br>urban practices<br>who teach students<br>from the University<br>of Queensland<br>medical program<br>Sample Size: 60<br>Level of Students:<br>Medical students<br>year 3 | n = 60 GPs surveyed<br>-Intellectual<br>stimulation, 31(52%)<br>-Intrinsic satisfaction<br>of teaching, 26(43%)<br>-Company of young,<br>enthusiastic students,<br>20(33%)<br>-Exposure to<br>students' knowledge,<br>19(32%)<br>-Opportunity to<br>showcase general<br>practice, 17(28%)<br>-Discharging<br>obligation to teach,<br>15(25%)<br>-Advantages to<br>patients who<br>participate in<br>teaching<br>consultations, | n = 60 GPs surveyed<br>-Time management,<br>50(83%)<br>-Concerns about<br>patients, 28(47%)<br>-Mental fatigue,<br>25(42%)<br>-Challenges intrinsic<br>to practice-based<br>teaching, 24(40%)<br>-Adverse student<br>factors, 22(37%)<br>-Exposing general<br>practice, 15(25%)<br>-Possible difficulty<br>in providing and<br>consenting patients<br>to active learning<br>opportunities for<br>students | -Recruitment and<br>retention<br>strategies should<br>promote the<br>rewards of<br>teaching<br>-Teacher training<br>should respond to<br>the costs and<br>challenges of<br>practice-based<br>teaching                                                                |

|    |                                 |                                            |                                                                                                                                                                                                                                     |                                                                                  |                                                                                                                                                                                                                                                                                                       |                                                                                                                                                                                                                                                                                                                                                                                    |
|----|---------------------------------|--------------------------------------------|-------------------------------------------------------------------------------------------------------------------------------------------------------------------------------------------------------------------------------------|----------------------------------------------------------------------------------|-------------------------------------------------------------------------------------------------------------------------------------------------------------------------------------------------------------------------------------------------------------------------------------------------------|------------------------------------------------------------------------------------------------------------------------------------------------------------------------------------------------------------------------------------------------------------------------------------------------------------------------------------------------------------------------------------|
|    |                                 |                                            |                                                                                                                                                                                                                                     | 13(22%)                                                                          |                                                                                                                                                                                                                                                                                                       |                                                                                                                                                                                                                                                                                                                                                                                    |
| 40 | Sturman N.                      | Australian Family Physician; 2011          | Design: Qualitative semistructured interview<br>Population: General practitioners who teach students from the University of Queensland medical program<br>Sample Size: 60<br>Level of Students: Medical students year 3             |                                                                                  | -Concerns related to assessing students fairly: "How good are they meant to be?"<br>-Concerns over obtaining consent from patients to have medical student present<br>-Dilemma over maintaining patient confidentiality when pertinent, but personal psychosocial issues had been revealed previously | -Identify student before seeking patient consent for teaching, or ask student to seek patient consent<br>-Model skill of seeking consent in difficult circumstances<br>-Acknowledge that patients may be reluctant to refuse consent or later regret having consented<br>-Maintain patient confidentiality in teaching consultations of sensitive, previously divulged information |
| 41 | Thompson C, Dogra B, McKinley R | Education for Primary Care; 2010           | Design: Survey<br>Population: General practitioners in Shropshire, England<br>Sample Size: 145<br>Level of Students: Undergraduate medical students                                                                                 |                                                                                  | -In the case of this study, GPs did not feel competent to teach all areas of psychiatry                                                                                                                                                                                                               | -Further work is indicated to look at what level of knowledge can be reasonably expected to be provided by GPs and what areas best reflect their clinical practice and caseload.                                                                                                                                                                                                   |
| 28 | Ullian JA, Shore WB, First LR   | Academic Medicine; 2001                    | Design: Survey, Interview<br>Population: Physicians involved in the Interdisciplinary Generalist Curriculum (IGC) project across 10 medical schools in the US<br>Sample Size: 2400<br>Level of Students: Medical students years 1-2 | -Possible rewards of recognition and appreciation desired<br>-Joy in teaching    | -Patient flow disrupted<br>-Workload increased<br>-Income decreased                                                                                                                                                                                                                                   |                                                                                                                                                                                                                                                                                                                                                                                    |
| 29 | Van Ham I, Verhoeven A,         | European Journal of General Practice; 2006 | Design: Literature review<br>Population: General                                                                                                                                                                                    | -Being involved in teaching medical students was a factor that increased the job |                                                                                                                                                                                                                                                                                                       |                                                                                                                                                                                                                                                                                                                                                                                    |

|    |                                           |                                       |                                                                                                                                                                                            |                                                                                                                                                                                                                                                                                                                 |                                                                                                                                                                                                                                                                                                                                                                                                                                                            |                                                                                                                                                                                 |
|----|-------------------------------------------|---------------------------------------|--------------------------------------------------------------------------------------------------------------------------------------------------------------------------------------------|-----------------------------------------------------------------------------------------------------------------------------------------------------------------------------------------------------------------------------------------------------------------------------------------------------------------|------------------------------------------------------------------------------------------------------------------------------------------------------------------------------------------------------------------------------------------------------------------------------------------------------------------------------------------------------------------------------------------------------------------------------------------------------------|---------------------------------------------------------------------------------------------------------------------------------------------------------------------------------|
|    | Groenier K et al                          |                                       | practitioners<br>Sample Size: 24<br>Level of Students:<br>Undergraduate<br>medical students                                                                                                | satisfaction of GPs                                                                                                                                                                                                                                                                                             |                                                                                                                                                                                                                                                                                                                                                                                                                                                            |                                                                                                                                                                                 |
| 30 | Vath BE, Schneeweiss R, Scott CS          | The Western Journal of Medicine; 2001 | Design: Survey<br>Population: Physicians in the Pacific Northwest who teach medical students<br>Sample Size: 333<br>Level of Students: Medical students years 1-2                          | -Joy of teaching students most important factor<br>-Skills sharpened when teaching medical students                                                                                                                                                                                                             | -Workload increased (63%)<br>-Reduced time for teaching (56%)<br>-Administrative duties can make it difficult to volunteer                                                                                                                                                                                                                                                                                                                                 | -Medical schools must identify wider berth of physicians willing to teach and reward these teachers accordingly.<br>-Address need for ongoing recognition of volunteer teachers |
| 42 | Vinson DC, Paden C                        | Academic Medicine; 1994               | Design: Survey<br>Population: Family physicians associated with the University of Missouri-Columbia School of Medicine<br>Sample Size: 46<br>Level of Students: Medical students years 3-4 |                                                                                                                                                                                                                                                                                                                 | -Increase in time at work (average 46 minutes per day)<br>-5/46 Preceptors noted decreases in billed charges                                                                                                                                                                                                                                                                                                                                               |                                                                                                                                                                                 |
| 31 | Vinson DC, Paden C, Deveras Sales A et al | Journal of Family Practice; 1997      | Design: Survey<br>Population: Generalist physicians in community based practice in the United States<br>Sample Size: 2074<br>Level of Students: Undergraduate medical students             | -Physicians who had received part of their medical school education in a community setting were more likely to teach students in their practice.<br>-Physicians whose practices were closer to medical schools were more likely to teach<br>-Only 9% of physicians reported being paid for teaching commitments | -Teachers noted a 30-minute (median) lengthening of workday when a student was present<br>-30% saw fewer patients per day with a student in the practice<br>-Solo practitioners were less likely to be involved in teaching<br>-79% of surveyed physicians reported receiving 2 days or less of teacher training<br>-Loss of patient-care productivity is substantial with presence of student<br>-Only 9% of physicians reported being paid for teaching. | -Train volunteer faculty to teach more effectively as it may be difficult to fully reimburse the time a busy practitioner dedicates to teaching                                 |

|    |                                          |                                            |                                                                                                                                                                                                         |                                                                                                                                                                                                                                          |                                                                                                                                                                                                                                                                                                                                        |                                                                                                                                  |
|----|------------------------------------------|--------------------------------------------|---------------------------------------------------------------------------------------------------------------------------------------------------------------------------------------------------------|------------------------------------------------------------------------------------------------------------------------------------------------------------------------------------------------------------------------------------------|----------------------------------------------------------------------------------------------------------------------------------------------------------------------------------------------------------------------------------------------------------------------------------------------------------------------------------------|----------------------------------------------------------------------------------------------------------------------------------|
| 43 | Whiting D                                | Journal of Medical Ethics; 2007            | Design: Key informant<br>Population: Medical educators who teach medical students<br>Sample Size: N/A<br>Level of Students: Undergraduate medical students                                              |                                                                                                                                                                                                                                          | -May be cases where medical educators encounter students with inappropriate attitudes. i.e. Poor attitude toward those of a different race, ethnicity, gender, etc.                                                                                                                                                                    | -Medical schools should ensure that measures are in place to reliably assess attitudes in students                               |
| 32 | Wilson A, Fraser R, McKinley RK et al    | British Journal of General Practice; 1996  | Design: Survey<br>Population: General practitioners associated with Leicester Medical School in the UK<br>Sample Size: 166<br>Level of Students: Undergraduate medical students                         | -Surveyed practice-based teachers were likely to be highly supportive of academic departments setting explicit educational requirements.<br>-Most practice-based teachers retain enthusiasm for being involved in high quality teaching. | -139 (89%) of doctors felt that present levels of remuneration were inadequate for time commitment<br>-113 (87%) of doctors felt that time pressures in teaching practices had increased from 1990-1996<br>-40% of lead teachers felt they have less enthusiasm for teaching and have encountered more resistance from their partners. | -Provide protected time for teaching in general practice<br>-Appropriate funding for reduced list sizes due to teaching time     |
| 33 | Wooliscroft JO, Harrison RV, Anderson MB | Teaching and Learning in Medicine; 2002    | Design: Survey<br>Population: Award-winning clinical teachers from US medical schools<br>Sample Size: 949<br>Level of Students: Medical students, residents and fellows                                 | -Intrinsic incentives for teaching increase as the level of the student increases                                                                                                                                                        | -Institutions tend to provide supportive teaching environments, but do not reward teaching financially                                                                                                                                                                                                                                 |                                                                                                                                  |
| 34 | Wright SM, Beasley BW                    | Mayo Clinic Proceedings, Mayo Clinic; 2004 | Design: Prospective cohort and survey<br>Population: Physician faculty members hired at the assistant professor level<br>Sample Size: 183<br>Level of Students: Medical students, residents and fellows | -Physicians with stake in medical education value 'helping others' as main incentive compared to scientifically active physicians who value self-expression more highly                                                                  |                                                                                                                                                                                                                                                                                                                                        | -Understanding inspiration for physicians may help medical leadership to better motivate and relate to their physician workforce |
